# Supplementary material for: Ash2 acts as an ecdysone receptor coactivator by stabilizing the histone methyltransferase Trr
Source: PubMed Central journal article supplement — Mol Biol Cell. 2013 Feb 1;24(3):361–72. doi: 10.1091/mbc.E12-04-0267 (PMC3565548; doi:10.1091/mbc.e12-04-0267), 2013-02-01
Supplement: supp_E12-04-0267v1_CombinedSupMats.pdf [file supp_E12-04-0267v1_CombinedSupMats.pdf]

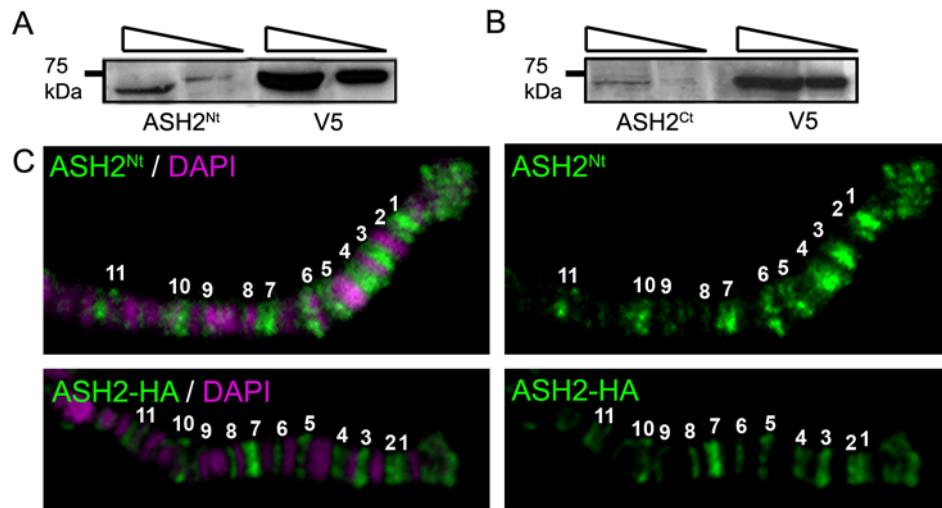

**Supplemental Figure 1. Characterization of Ash2 antibodies.** (A,B) Western blots with anti-Ash2<sup>Nt</sup> (A) and anti-Ash2<sup>Ct</sup> (B) were performed using S2 cells transfected with *ash2-RC-V5*. Anti-V5 was used as a control. (C) Overexpression of Ash2 with the *daughterless* driver did not produce additional Ash2 bands. The distribution of endogenous Ash2 (top panel) and overexpressed Ash2-HA (bottom panel) on a representative region of wild-type polytene chromosome corresponding to the 2L arm is shown. Immunostaining was performed using anti-Ash2<sup>Nt</sup> and anti-HA.

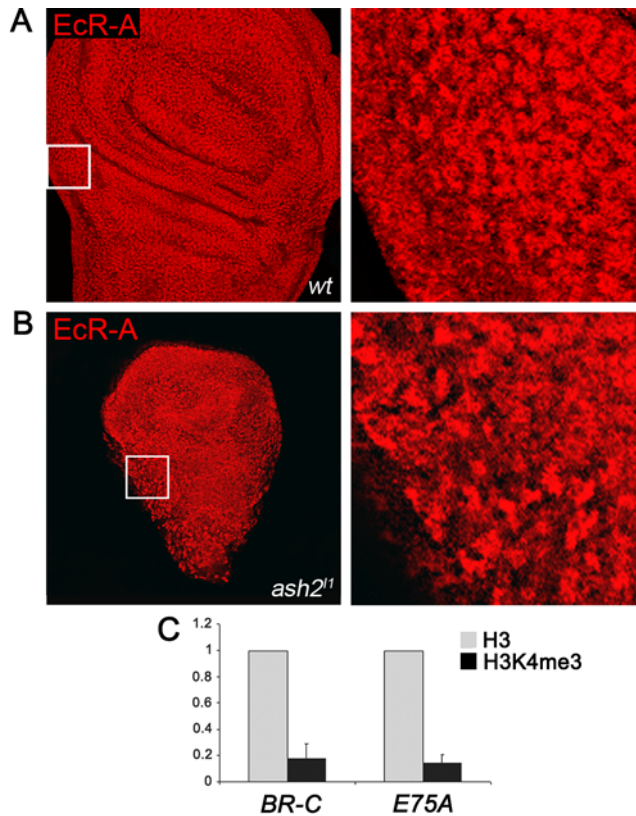

**Supplemental Figure 2. The loss of H3K4me3 in *ash2* mutants is not associated with a decrease of EcR or with a change in nucleosome occupancy.** (A,B) Detection of EcR-A in wild-type (A) and *ash2<sup>1/1</sup>* homozygous (B) wing imaginal disc. Both wing imaginal discs are presented at the same scale. Right panels show a magnification of the squared regions in left panels. (C) A ChIP analysis of wild-type and *ash2<sup>1/1</sup>* late wandering larva using H3 (grey) and H3K4me3 (black) antibodies. H3 was used as a mark of nucleosome positioning, and ChIP results are depicted as a ratio of fold enrichment from wild-type compared to *ash2<sup>1/1</sup>*. H3K4me3 results were normalized against H3 results. Error bars represent SEM.

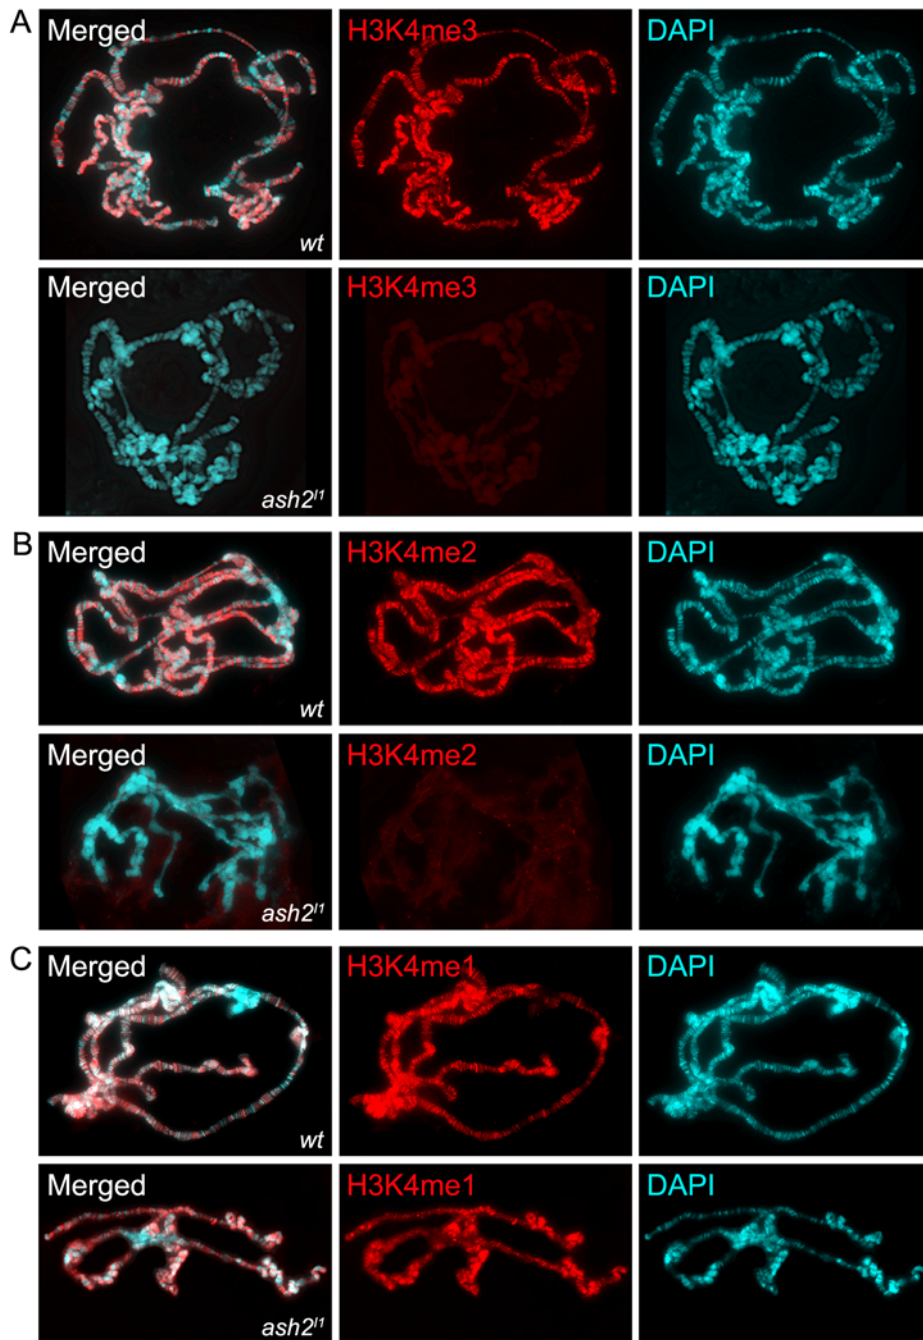

**Supplemental Figure 3. The loss of ASH2 affects the overall deposition of H3K4me3 and H3K4me2 but not that of H3K4me1.** Distribution of H3K4me3 (A), H3K4me2 (B), and H3K4me1 (C) on polytene chromosomes from wild-type (top panels) and *ash2<sup>1</sup>* (bottom panels) third instar larvae.

**Early responsive genes (<3h)  
downregulated (>0,5 FC) in *ash2<sup>1</sup>* wing  
imaginal discs**

*bip1*  
*BR-C*  
*CG11163*  
*CG13784*  
*CG13813*  
*CG14629*  
*CG18212*  
*CG4586*  
*CG6124*  
*CG6234*  
*CG6630*  
*CG8249*  
*crol*  
*Cyp4e2*  
*E23*  
*Eip55E*  
*Eip71CD*  
*Eip74EF*  
*E75A*  
*Eip78C*  
*Hr39*  
*Hsp27*  
*InR*  
*Pdi*

**Supplemental Table 1. Early responsive genes are downregulated in *ash2*<sup>1</sup> mutants.** A subset of EcR targets genes that were found to be up-regulated in response to 20HE at an early time ( $\leq 3$  h) (Gauhar *et al.*, 2009) and to be downregulated in wing imaginal discs from *ash2*<sup>1</sup> mutants (Beltran *et al.*, 2007) are listed.
